# Supplementary material for: Propionibacterium avidum: A Virulent Pathogen Causing Hip Periprosthetic Joint Infection
Source: Oxford University Press journal article supplement (doi:10.1093/cid/cix665), 2017-08-01
Supplement: cix665_suppl_tables_revisions.docx [file cix665_suppl_tables_revisions.docx]

**SUPPLEMENTARY TABLES**

**Supplementary Table 1**. Clinical characteristics of 12 patients with PJI caused by *P. avidum* (8 monomicrobial and 4 polymicrobial infections).

| **Nr** | **Age,**  **sex** | **Joint** | **BMI**  **(kg/m2)** | **Infection onset (mt/year)** | **Time to diagnosis (mt)** | | **Symptoms** | **MRI findings** | **Surgical Treatment** | **Antibiotics p.o (total duration, weeks)** |
| --- | --- | --- | --- | --- | --- | --- | --- | --- | --- | --- |
| **Prospective (2015)** | | |  |  |  | |  |  |  |  |
| 1 | 59, f | Hip | 27.9 | 01/2015 | 14.5 | | Pain, sinus tract | Abscess, joint effusion | DAIR, then two-stage | Clindamycin (5.7) |
| 2 | 53, f | Hip | 39.6 | 08/2015 | 5.9 | | Pain, erythema, swelling | Abscess in soft tissues and muscle, joint effusion, osteomyelitis | Two-stage exchange | Levofloxacin/rifampin (10.0) |
| 3 | 64, f | Hip | 37.6 | 07/2015 | 0.8 | | Pain | Abscess, joint effusion | One-stage exchange | Levofloxacin/rifampin (16.7) |
| 4 | 81, m | Hip | 35.5 | 04/2015 | 7.0 | | Pain, sinus tract, erythema, swelling | Abscess, joint effusion, osteomyelitis | Two-stage exchange | Clindamycin (8.3) |
| **Retrospective (1997-2014)** | | | | | |
| 5 | 57, f | Hip | 31.9 | 6/2013 | 1.6 | | Pain, erythema, swelling | ND | DAIR, then two-stage exchange | Clindamycin (13) |
| 6 | 72, f | Hip | 36.2 | 3/2013 | 0.5 | | Pain, periprothetic fracture, wound secretion, fever | ND | One-stage exchange | Clindamycin/rifampin (13.1) |
| 7 | 45, f | Hip | 33.5 | 6/2012 | 2.2 | | Pain | ND | Antibiotic only, then two-stage exchange | Levofloxacin/rifampin (12.0) |
| 8 | 56, m | Hip | 40.6 | 11/2011 | 3.5 | | Pain, Fever | ND | Two-stage exchange | Clindamycin (14.7) |
| 9 | 65, f | Hip | 28.9 | 09/2011 | 2.5 | | Pain, loosening of prosthesis | ND | Partial 1-stage-, then two-stage exchange | Ciprofloxacin /rifampin (14.6) |
| 10 | 69, m | Shoulder | 28.7 | 03/2011 | 0.7 | | Pain, swelling, wound secretion, fever | ND | Partial 1-stage exchange | Ciprofloxacin /rifampin (12.0) |
| 11 | 56, m | Shoulder | 35.2 | 02/2011 | 12.6 | | Pain, wound secretion | ND | Two-stage exchange | Clindamycin/rifampin (12.7) |
| 12 | 63, f | Hip | 32.9 | 01/2008 | 7.0 | | Sinus tract, pain, fever | ND | Initial DAIR, then two-stage exchange | Levofloxacin/rifampin (13.3) |

DAIR, debridement, antibiotics, irrigation, and retention; ND, not done; f, female; m, male; mt, month
